# Supplementary material for: A DFT study of oxygen dissociation on platinum based nanoparticles
Source: Royal Society of Chemistry journal article supplement (doi:10.1039/c3nr04750d), 2013-11-15
Supplement: c3nr04750d.pdf [file c3nr04750d.pdf]

# A DFT study of oxygen dissociation on platinum based nanoparticles

Paul C. Jennings,<sup>a</sup> Hristiyan A. Aleksandrov,<sup>b,c</sup> Konstantin M. Neyman,<sup>b,d</sup> and Roy L. Johnston<sup>\*e</sup>

<sup>a</sup> School of Chemical Engineering, University of Birmingham, Edgbaston, Birmingham, UK.

<sup>b</sup> Departament de Química Física & IQTCUB, Universitat de Barcelona, Spain.

<sup>c</sup> Faculty of Chemistry and Pharmacy, University of Sofia, Sofia, Bulgaria.

<sup>d</sup> Institució Catalana de Recerca i Estudis Avançats (ICREA), Barcelona, Spain.

<sup>e</sup> School of Chemistry, University of Birmingham, Edgbaston, Birmingham, UK

Fax: +44 (0)121 414 4403; Tel: +44 (0) 121 414 7477; E-mail: r.l.johnston@bham.ac.uk

## Supplementary Information

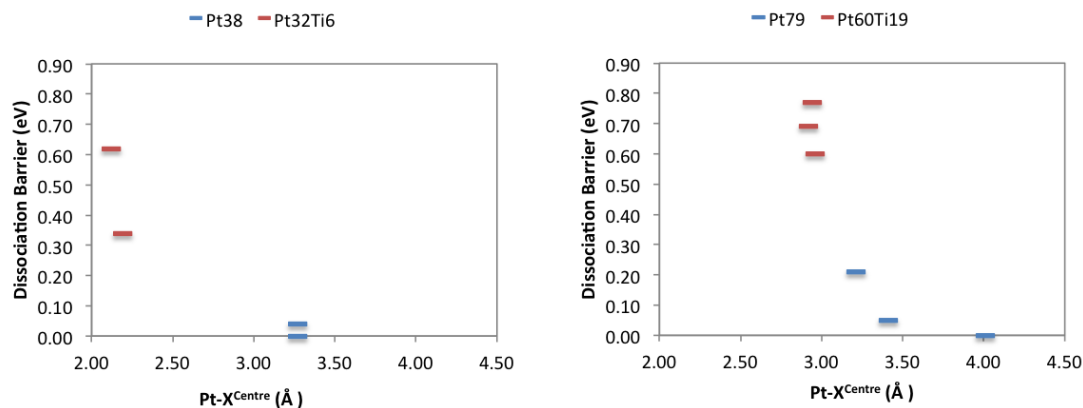

**Fig. S1** Plot of Pt-X<sup>centre</sup> against dissociation barrier at the IS for 38 atom (left) and 79 atom (right) clusters.

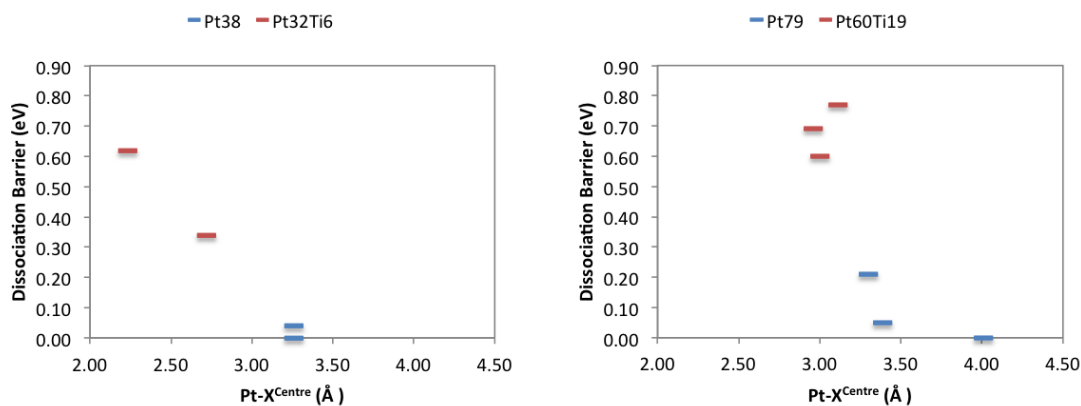

**Fig. S2** Plot of Pt-X<sup>centre</sup> against dissociation barrier at the TS for 38 atom (left) and 79 atom (right) clusters.

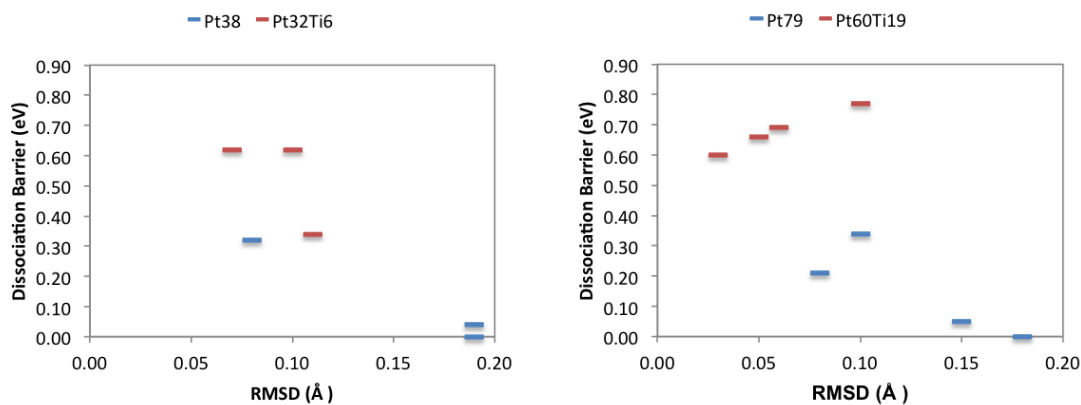

**Fig. S3** Plot of RMSD against dissociation barrier at the TS for 38 atom (left) and 79 atom (right) clusters.

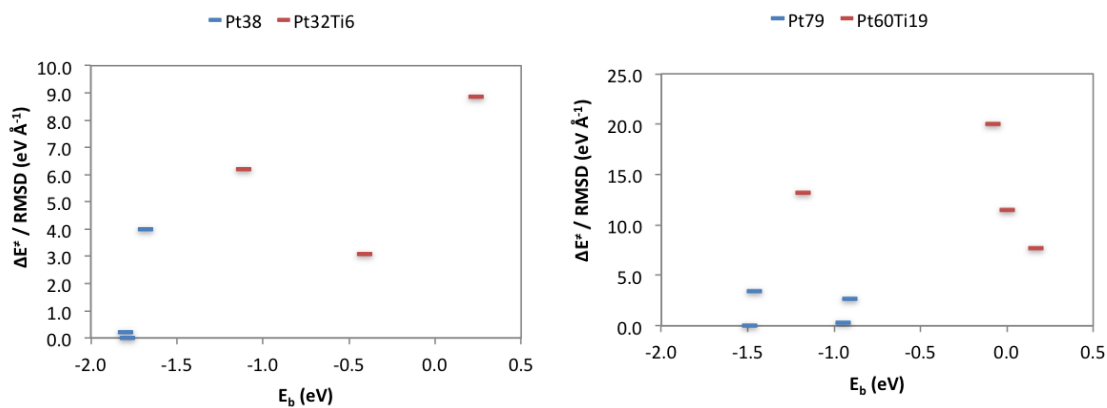

**Fig. S4** Plot of  $\Delta E^\ddagger / \text{RMSD}$  against  $E_b$  at the TS for 38 atom (left) and 79 atom (right) clusters.

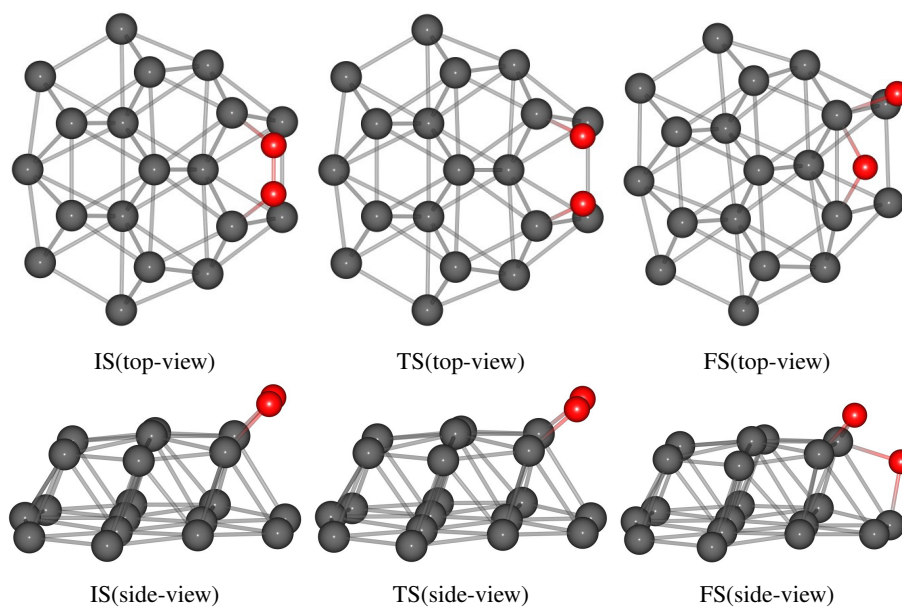

**Fig. S5** IS, TS and FS structures for  $\text{O}_2$  dissociation on  $\text{Pt}_{38}$ , when  $\text{O}_2$  is located at **position 5**. Only top two layers of metal atoms are shown.

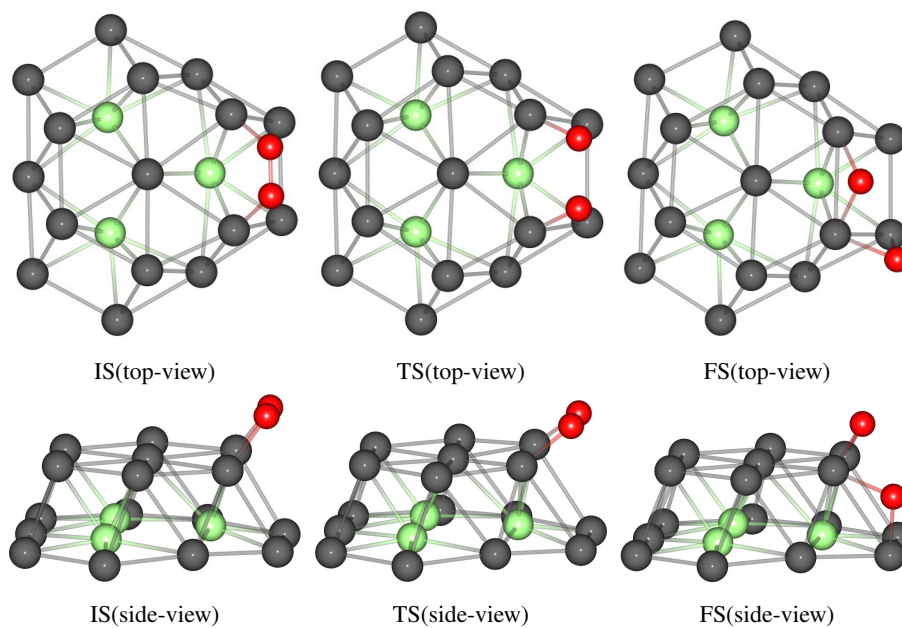

**Fig. S6** IS, TS and FS structures for  $\text{O}_2$  dissociation on  $\text{Pt}_{32}\text{Ti}_6$ , when  $\text{O}_2$  is located at **position 5**. Only top two layers of metal atoms are shown.

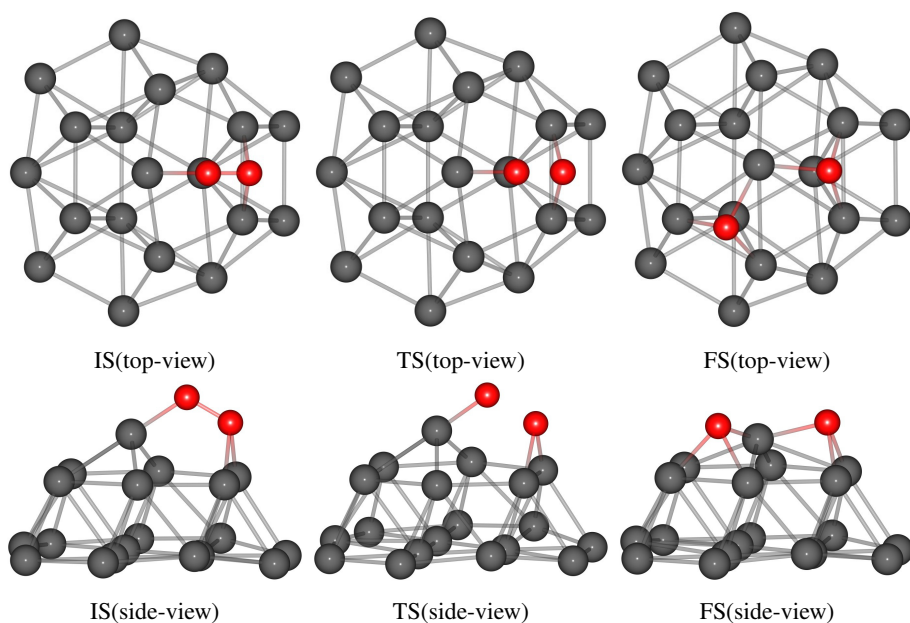

**Fig. S7** IS, TS and FS structures for  $\text{O}_2$  dissociation on  $\text{Pt}_{38}$ , when  $\text{O}_2$  is located at **position 6**. Only top two layers of metal atoms are shown.

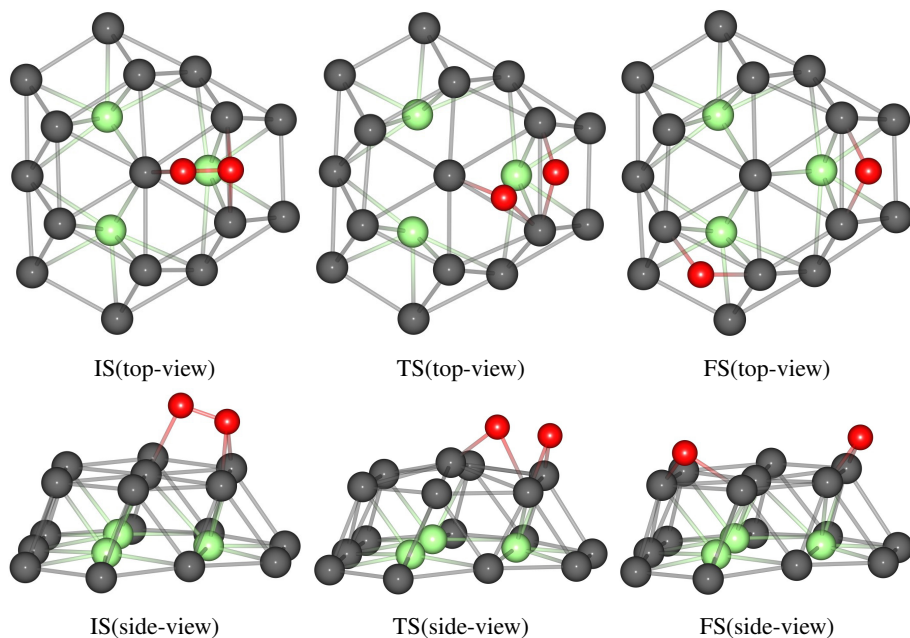

**Fig. S8** IS, TS and FS structures for  $\text{O}_2$  dissociation on  $\text{Pt}_{32}\text{Ti}_6$ , when  $\text{O}_2$  is located at **position 6**. Only top two layers of metal atoms are shown.

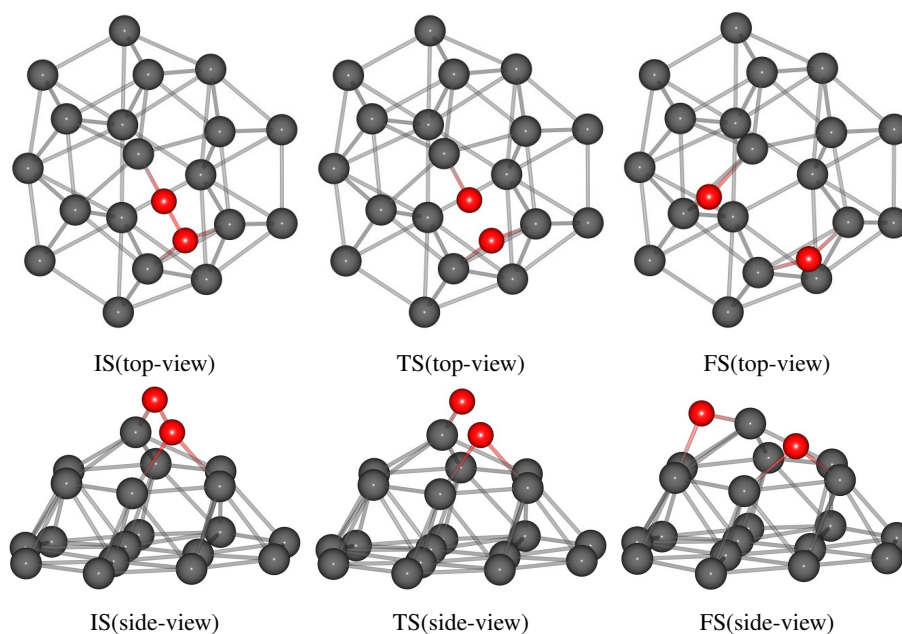

**Fig. S9** IS, TS and FS structures for  $\text{O}_2$  dissociation on  $\text{Pt}_{38}$ , when  $\text{O}_2$  is located at **position 7**. Only top two layers of metal atoms are shown.

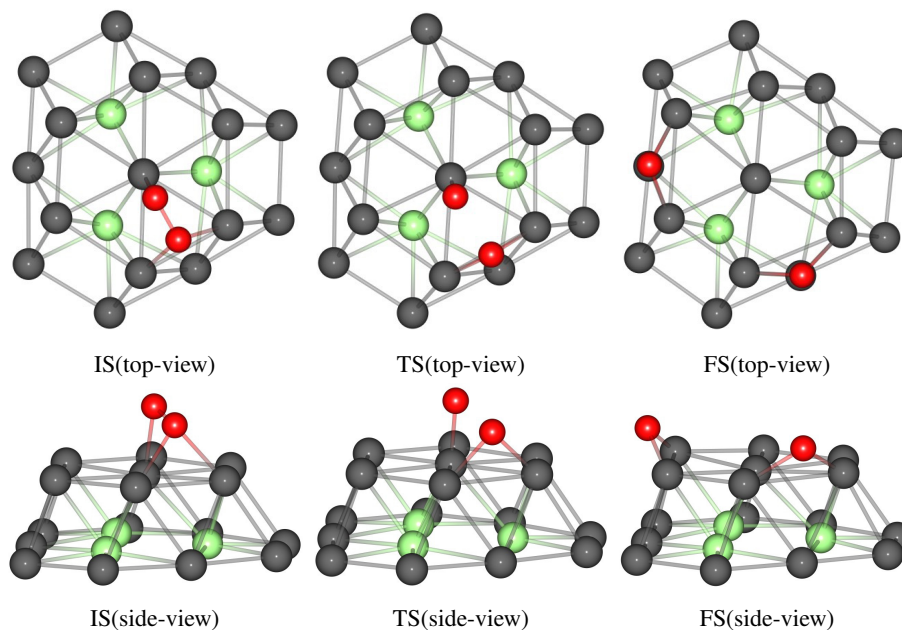

**Fig. S10** IS, TS and FS structures for  $\text{O}_2$  dissociation on  $\text{Pt}_{32}\text{Ti}_6$ , when  $\text{O}_2$  is located at **position 7**. Only top two layers of metal atoms are shown.

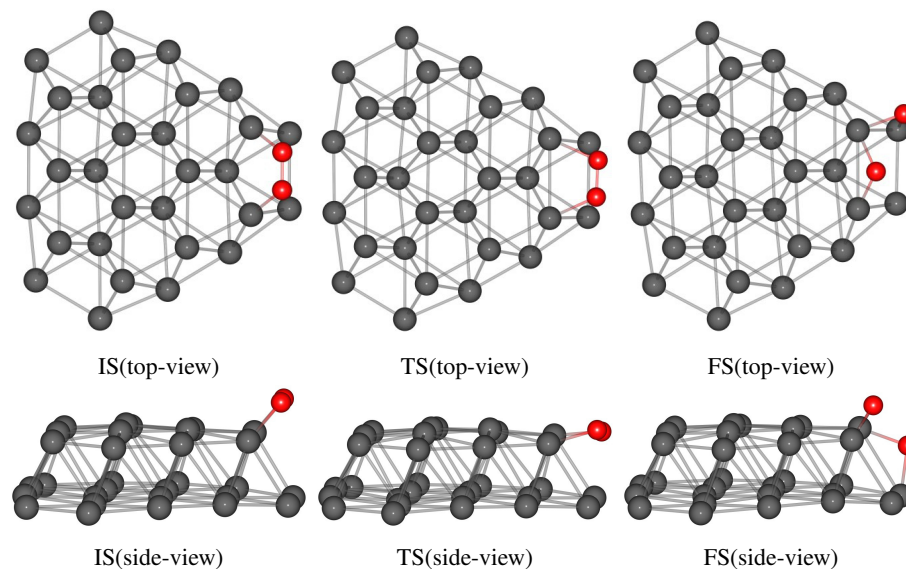

**Fig. S11** IS, TS and FS structures for  $\text{O}_2$  dissociation on  $\text{Pt}_{79}$ , when  $\text{O}_2$  is located at **position 8**. Only top two layers of metal atoms are shown.

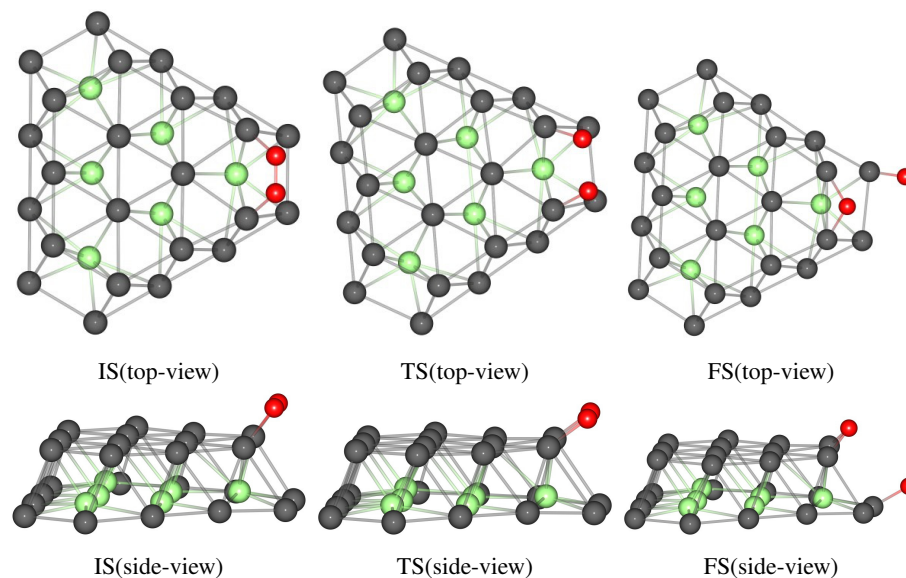

**Fig. S12** IS, TS and FS structures for  $\text{O}_2$  dissociation on  $\text{Pt}_{60}\text{Ti}_{19}$ , when  $\text{O}_2$  is located at **position 8**. Only top two layers of metal atoms are shown.



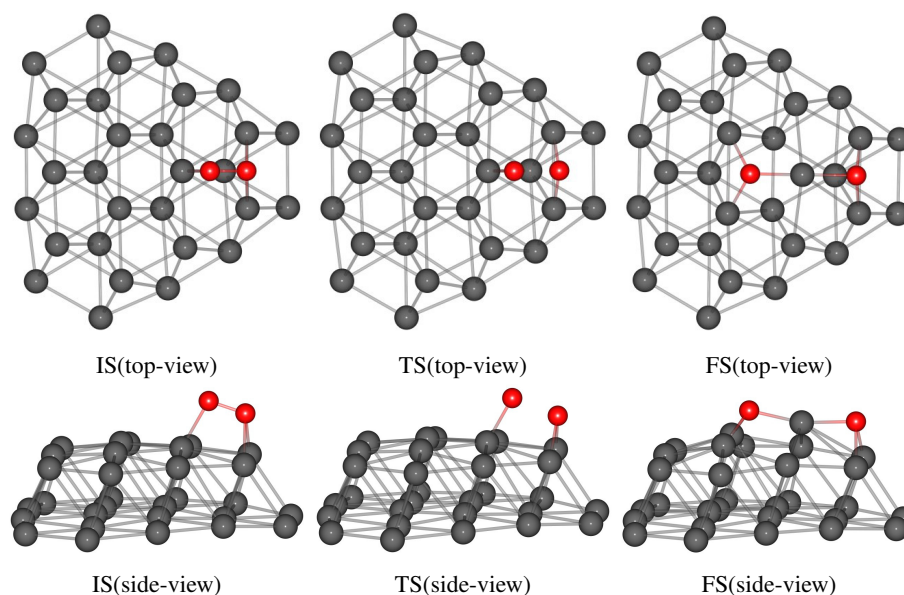

**Fig. S13** IS, TS and FS structures for  $\text{O}_2$  dissociation on  $\text{Pt}_{79}$ , when  $\text{O}_2$  is located at **position 9**. Only top two layers of metal atoms are shown.

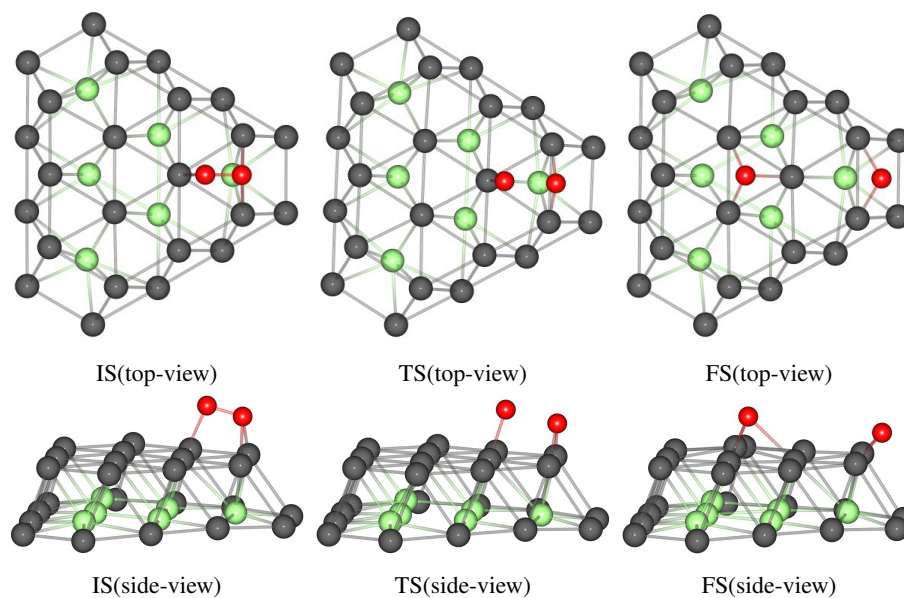

**Fig. S14** IS, TS and FS structures for  $\text{O}_2$  dissociation on  $\text{Pt}_{60}\text{Ti}_{19}$ , when  $\text{O}_2$  is located at **position 9**. Only top two layers of metal atoms are shown.

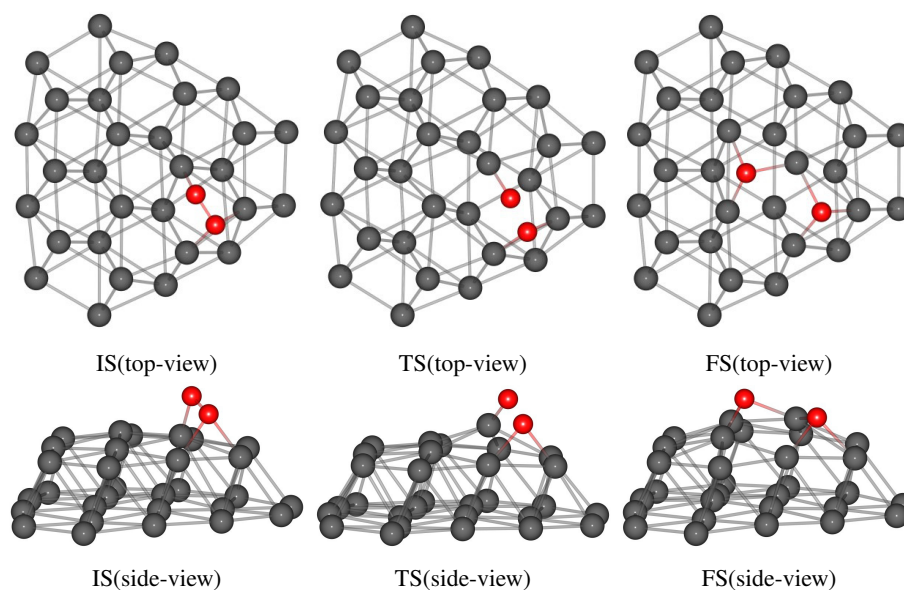

**Fig. S15** IS, TS and FS structures for  $\text{O}_2$  dissociation on  $\text{Pt}_{79}$ , when  $\text{O}_2$  is located at **position 10**. Only top two layers of metal atoms are shown.

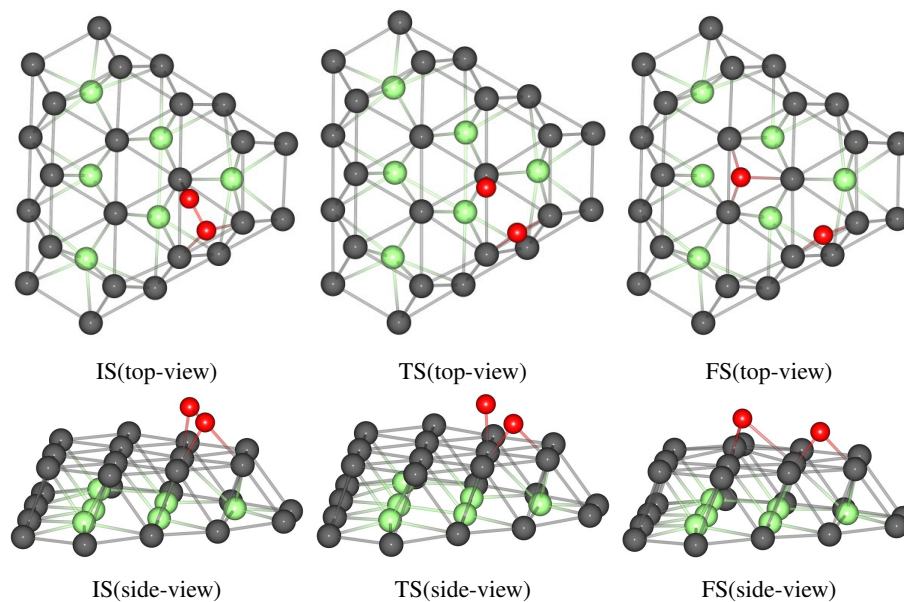

**Fig. S16** IS, TS and FS structures for  $\text{O}_2$  dissociation on  $\text{Pt}_{60}\text{Ti}_{19}$ , when  $\text{O}_2$  is located at **position 10**. Only top two layers of metal atoms are shown.



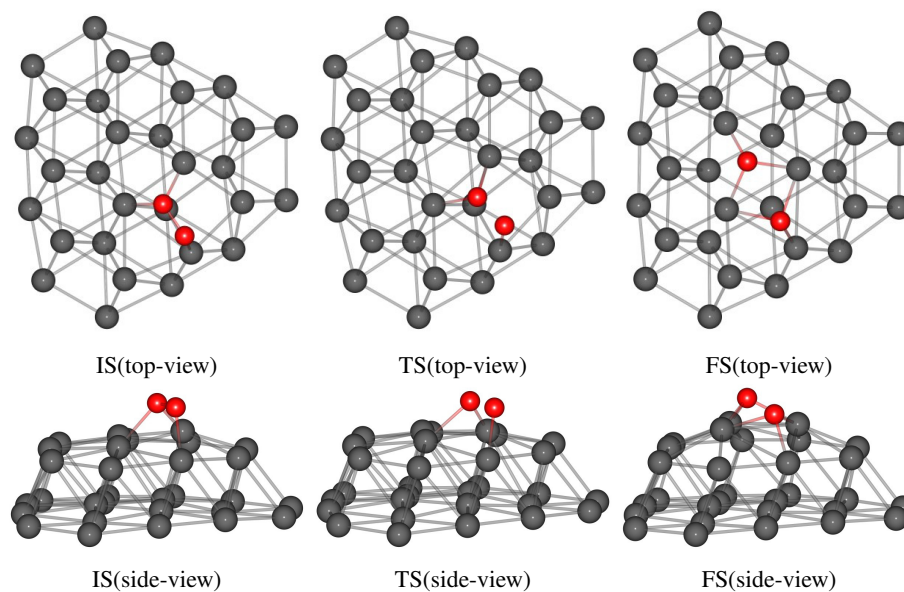

**Fig. S17** IS, TS and FS structures for  $\text{O}_2$  dissociation on  $\text{Pt}_{79}$ , when  $\text{O}_2$  is located at **position 11**. Only top two layers of metal atoms are shown.

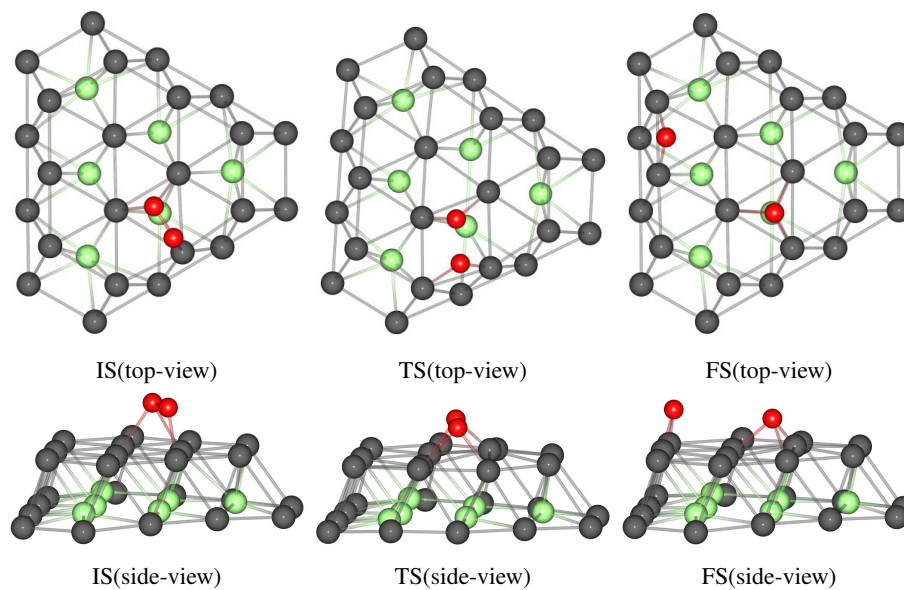

**Fig. S18** IS, TS and FS structures for  $\text{O}_2$  dissociation on  $\text{Pt}_{60}\text{Ti}_{19}$ , when  $\text{O}_2$  is located at **position 11**. Only top two layers of metal atoms are shown.
